# Supplementary material for: Comparison of Degradation Behavior of Newly Developed Encapsulation Materials for Photovoltaic Applications under Different Artificial Ageing Tests
Source: MDPI journal article supplement (doi:10.3390/polym13020271), 2021-01-15
Supplement: s1 [file s1]

# Supplementary Materials: Comparison of Degradation Behavior of Newly Developed Encapsulation Materials for Photovoltaic Applications Under Different Artificial Ageing Tests

Chiara Barretta, Gernot Oreski, Sonja Feldbacher, Katharina Resch-Fauster and Roberto Pantani

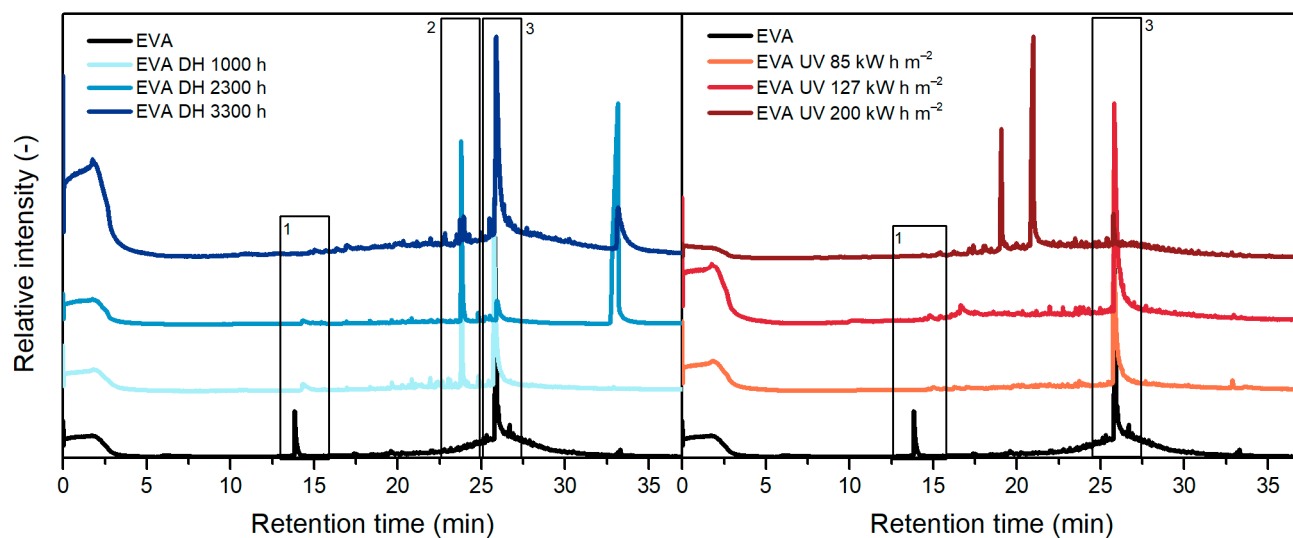

**Figure S1.** Chromatograms of EVA samples exposed to DH test (left) and UV test (right).

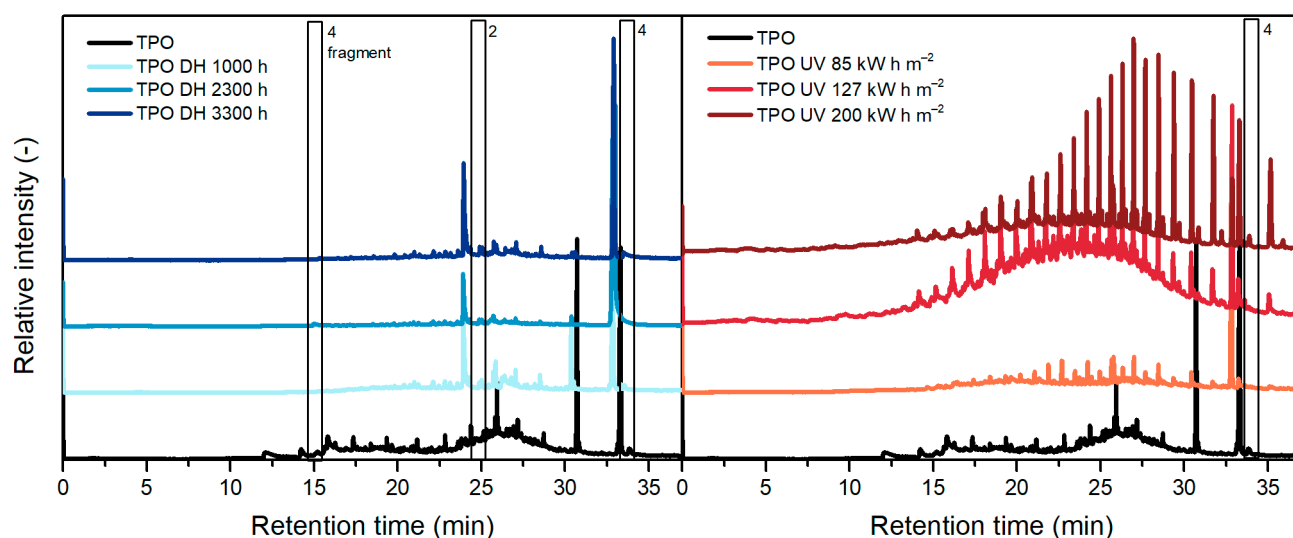

**Figure S2.** Chromatograms of TPO samples exposed to DH test (left) and UV test (right).

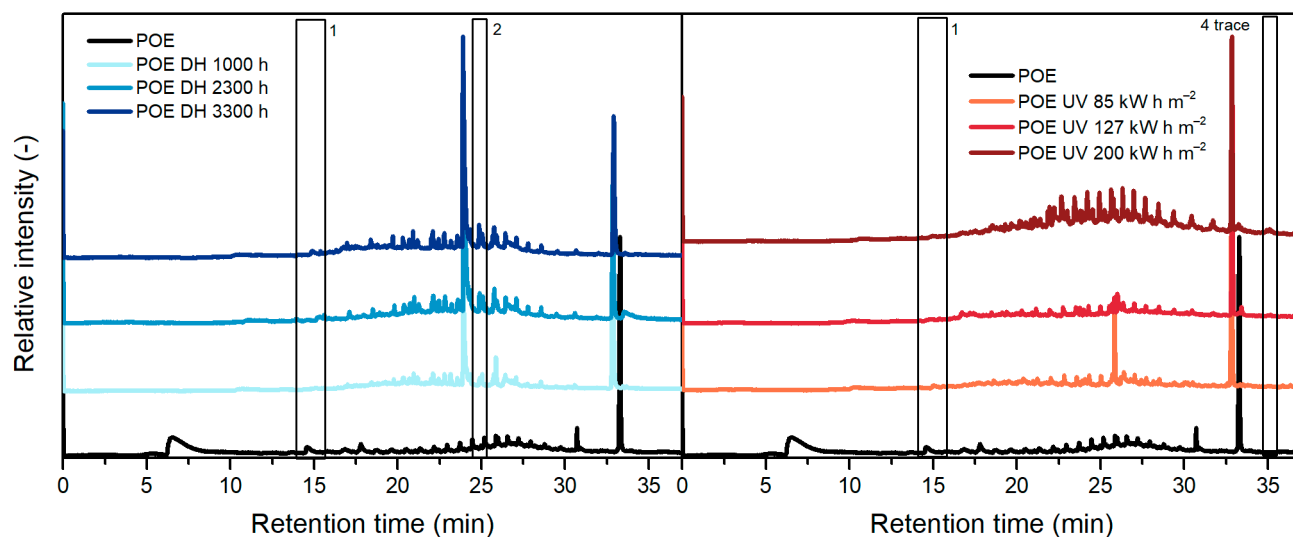

**Figure S3.** Chromatograms of POE samples exposed to DH test (left) and UV test (right).

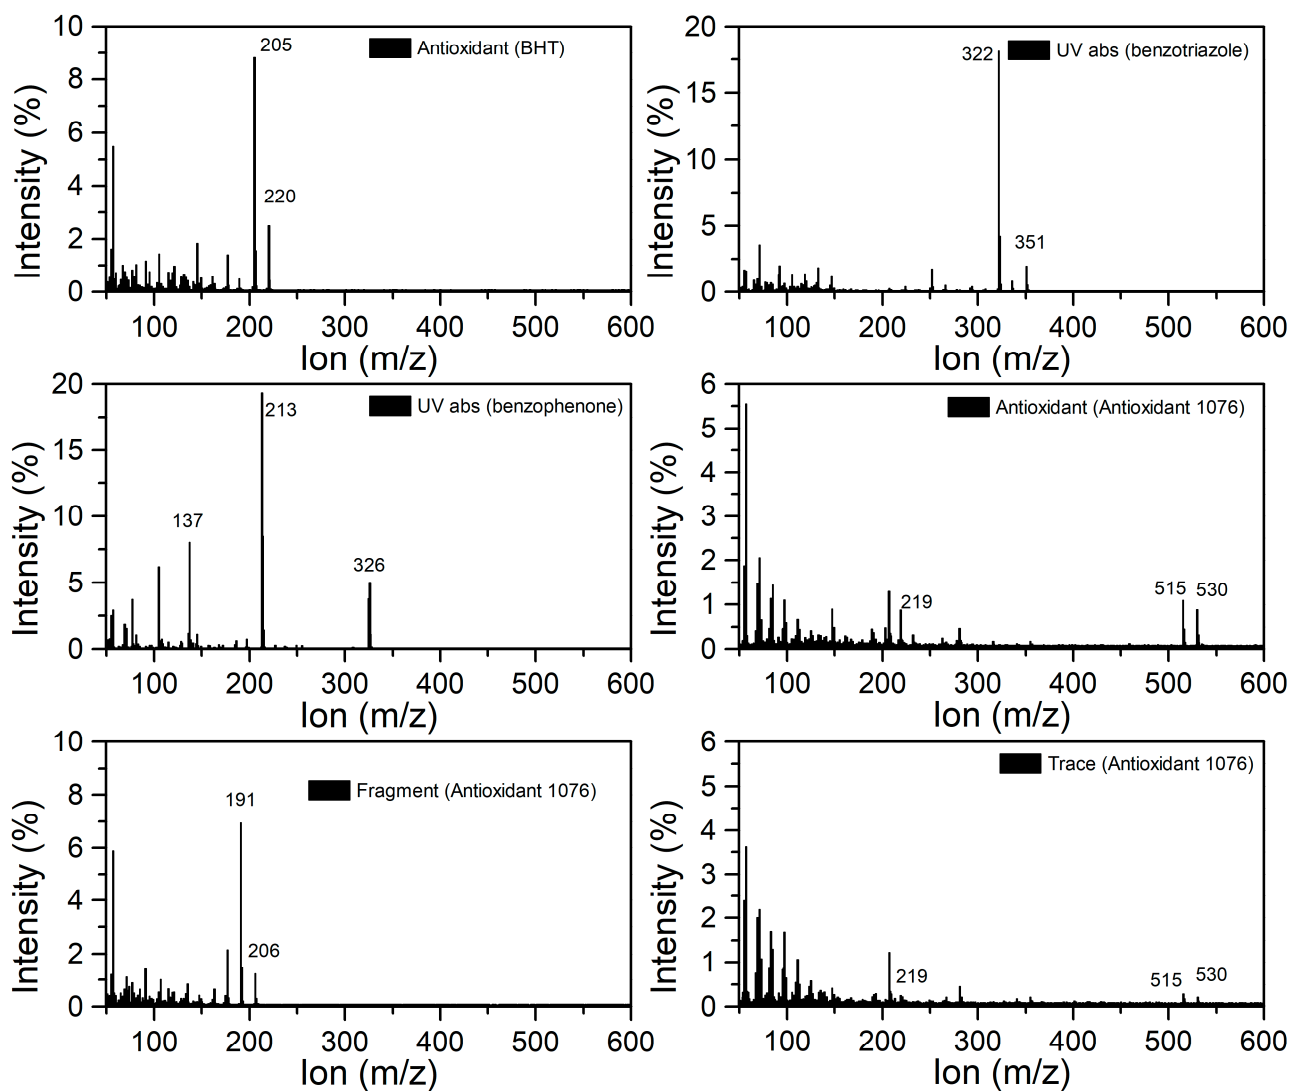

**Figure S4.** Mass spectra of the additives detected by means of TD-GC/MS.
